# Supplementary material for: Metagenome-validated combined amplicon sequencing and text mining-based annotations for simultaneous profiling of bacteria and fungi: vaginal microbiota and mycobiota in healthy women
Source: PubMed Central journal article supplement (PMC11681650; doi:10.1186/s40168-024-01993-9), 2024-12-28
Supplement: 40168_2024_1993_MOESM4_ESM.pdf [file 40168_2024_1993_MOESM4_ESM.pdf]

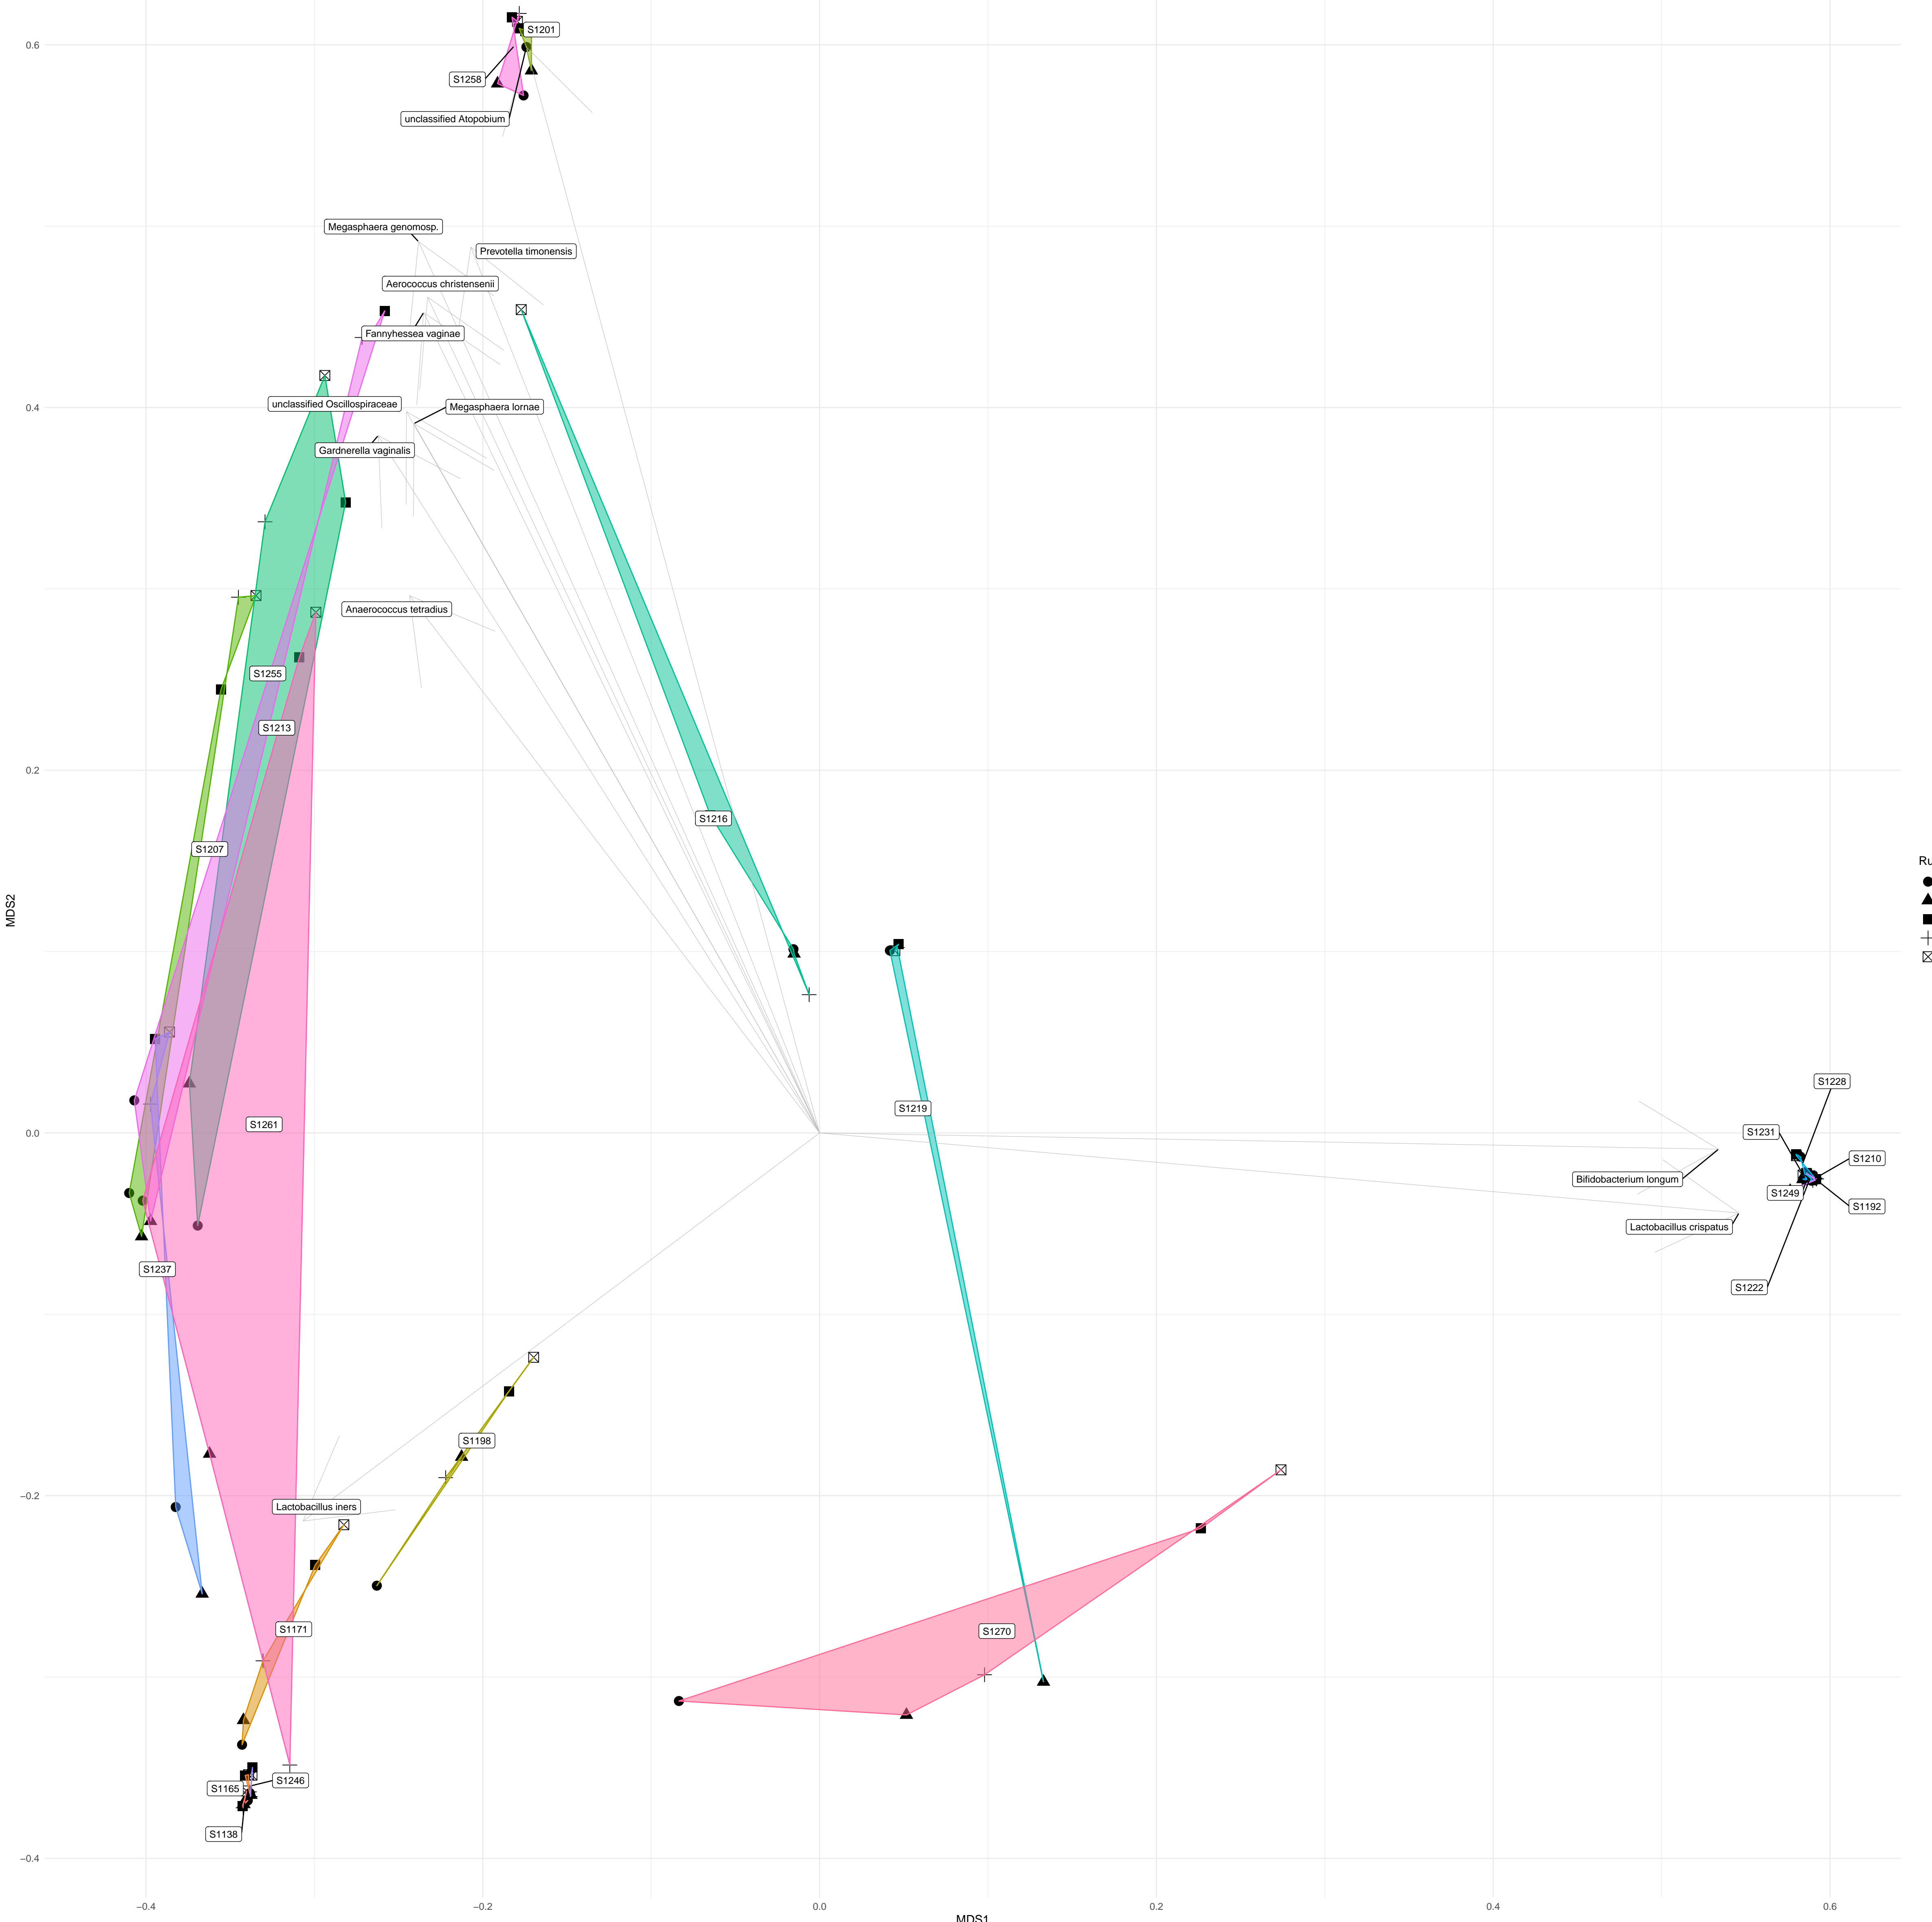

Run

- 16S-ITS taxminer
- ▲ 16S taxminer
- WGS Kraken2
- + WGS metaphlan
- ⊠ WGS VIRGO

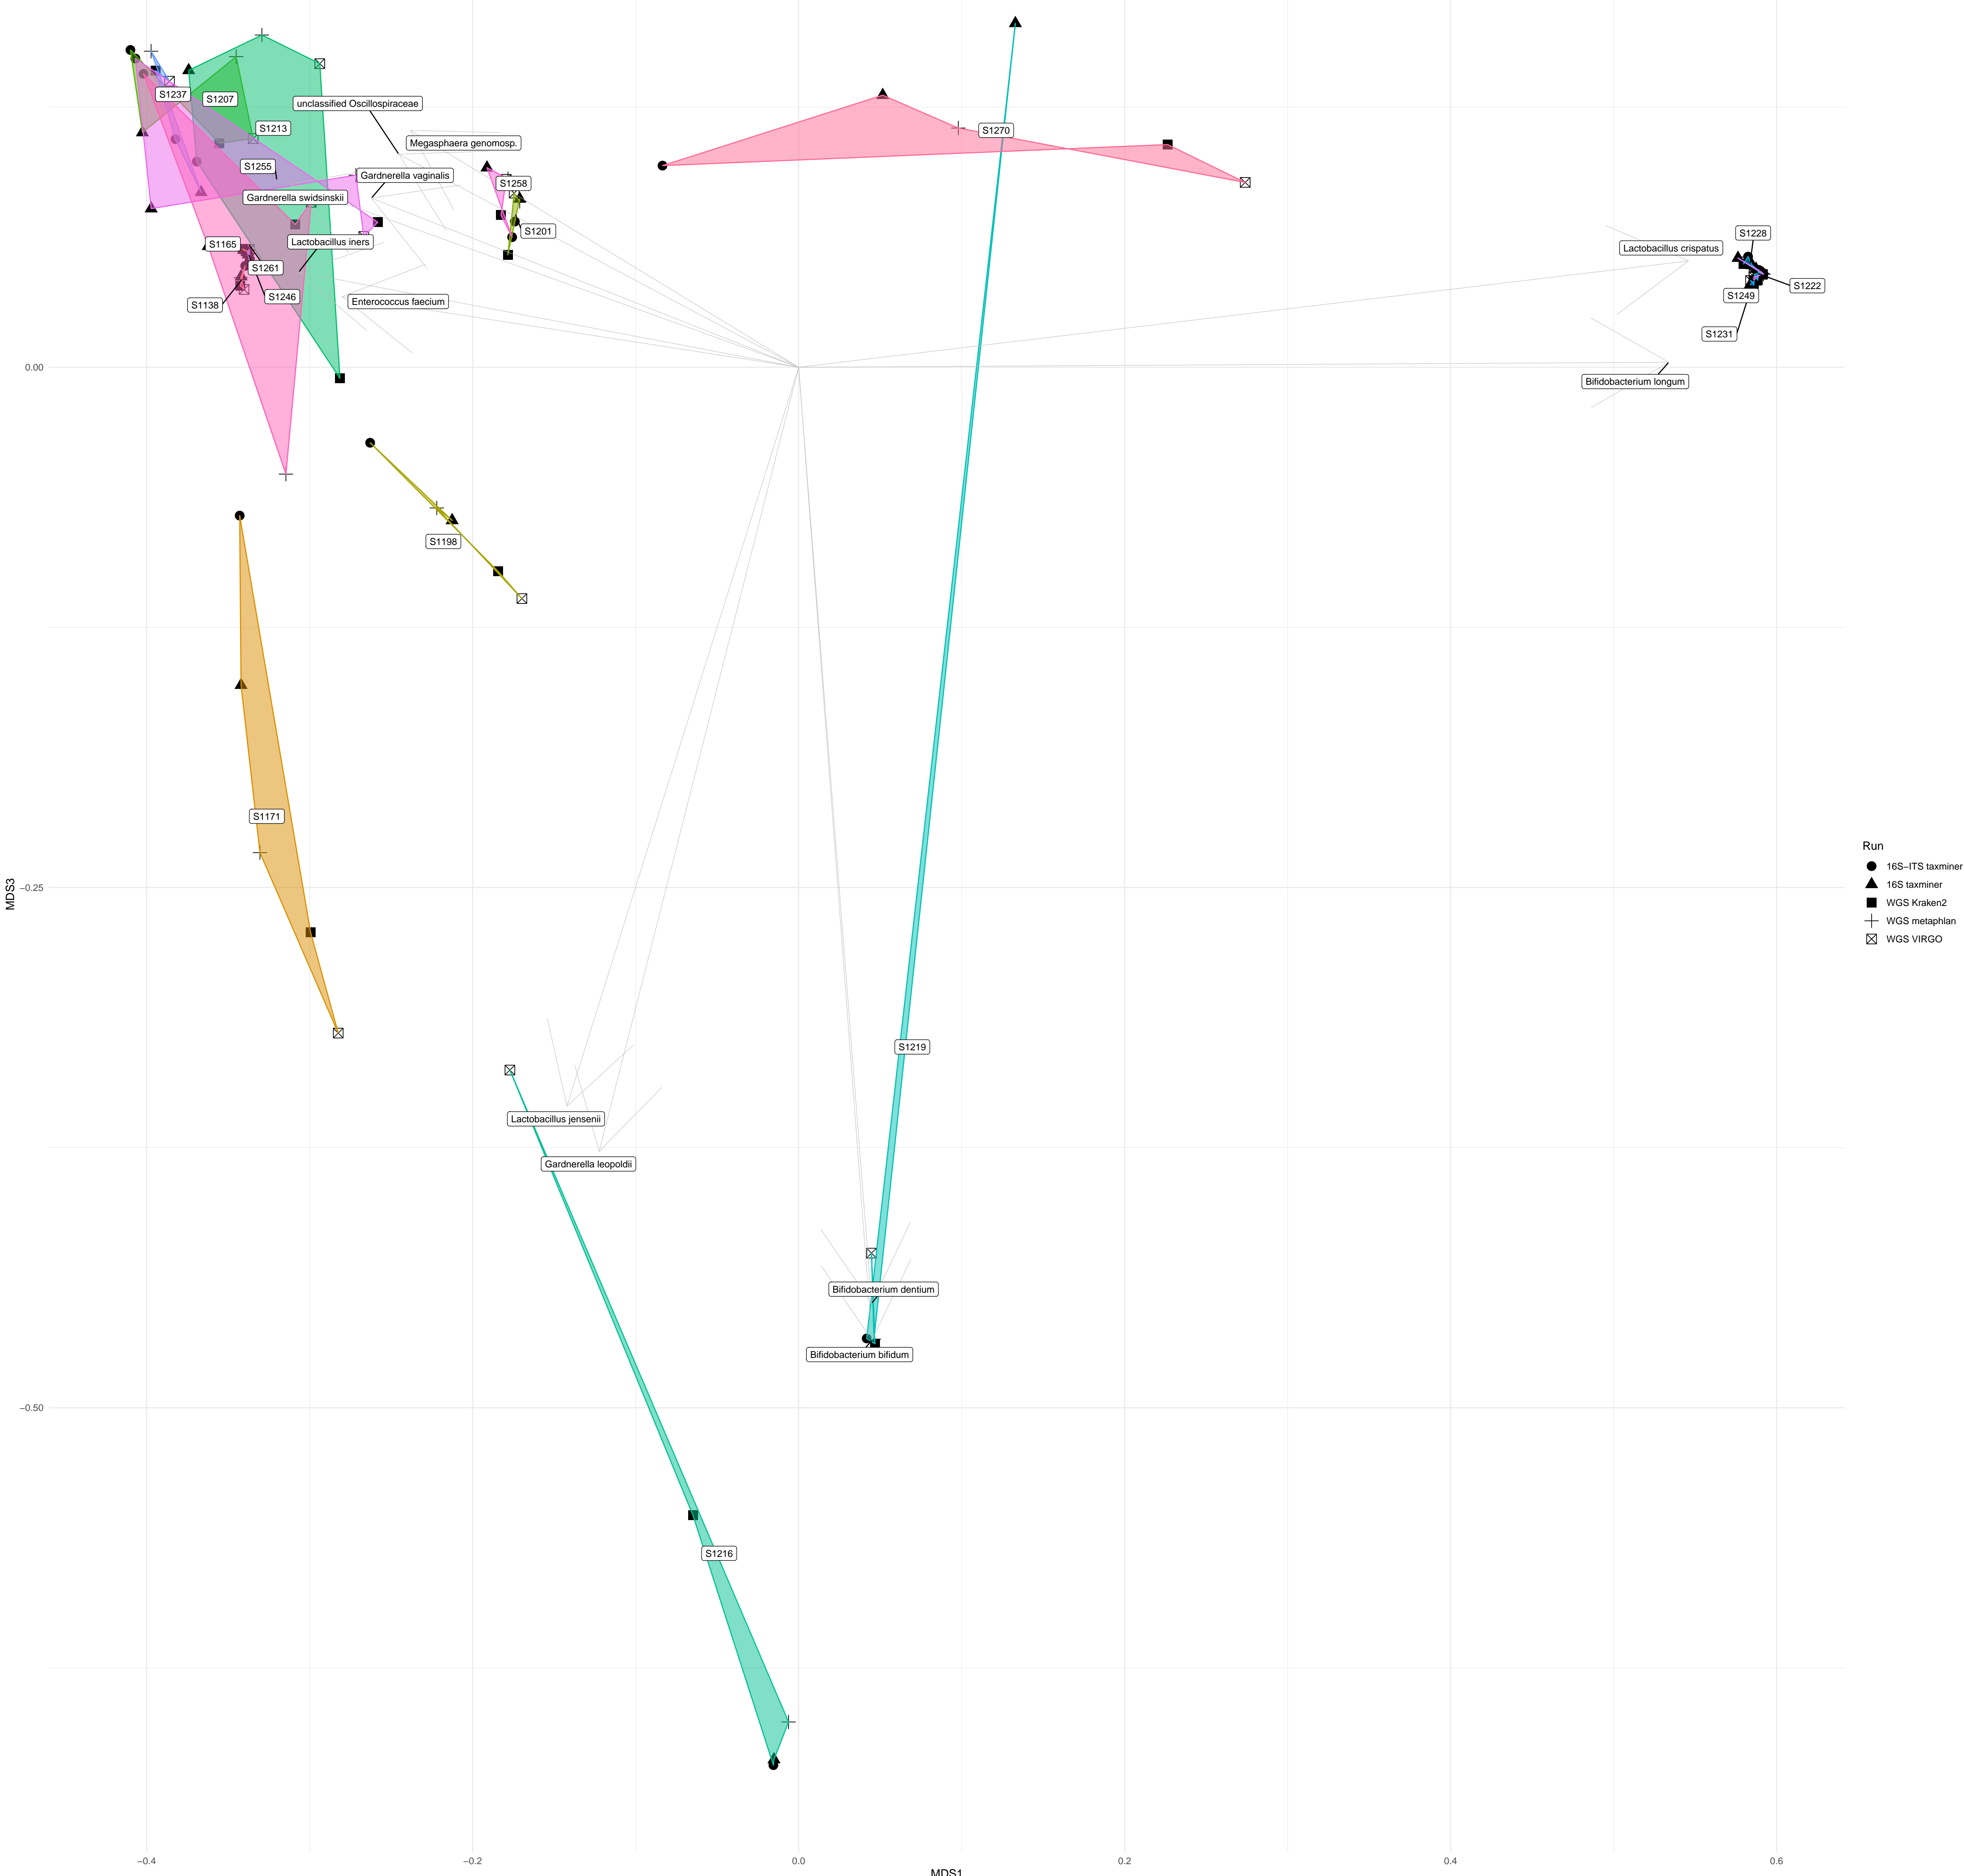

- Run
- 16S-ITS taxminer
  - ▲ 16S taxminer
  - WGS Kraken2
  - + WGS metaphlan
  - ⊠ WGS VIRGO
