# Supplementary material for: Metagenome-validated combined amplicon sequencing and text mining-based annotations for simultaneous profiling of bacteria and fungi: vaginal microbiota and mycobiota in healthy women
Source: PubMed Central journal article supplement (PMC11681650; doi:10.1186/s40168-024-01993-9), 2024-12-28

FunOMIC fungal compositions for extremely deep metagenomic sequencing.  
Zymomock contains equal amounts of *S. cerevisiae* and *C. neoformans*.

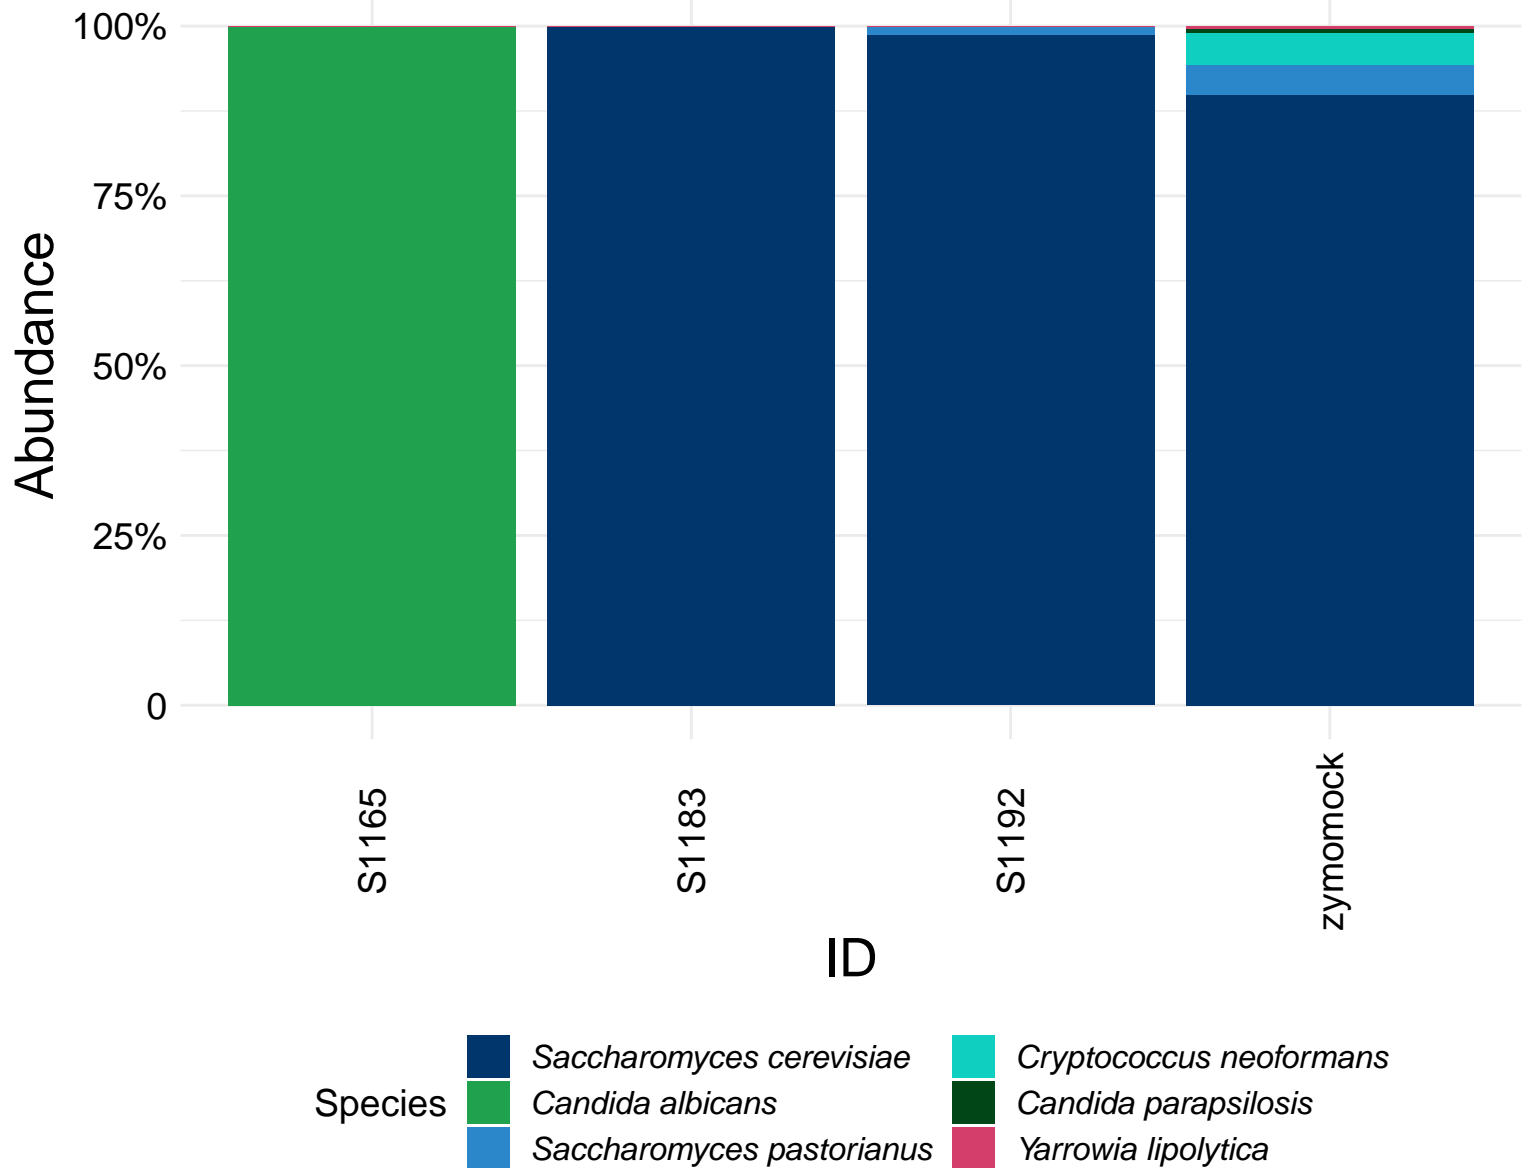

Supplement: 40168_2024_1993_MOESM7_ESM.pdf [file 40168_2024_1993_MOESM7_ESM.pdf]
